# Supplementary material for: Atmospheric Rivers and Associated Precipitation over France and Western Europe: 1980–2020 Climatology and Case Study
Source: MDPI journal article supplement (doi:10.3390/atmos12081075), 2021-08-21
Supplement: s1 [file s1]

Archive with 1 entries (1 files):
- atmosphere-1310736-supplementary.pdf
